# Supplementary material for: A hairpin probe-mediated DNA circuit for the detection of themecAgene ofStaphylococcus aureusbased on exonuclease III and DNAzyme-mediated signal amplification
Source: Royal Society of Chemistry journal article supplement (doi:10.1039/d1an00028d), 2021-01-01
Supplement: d1an00028d1.pdf [file d1an00028d1.pdf]

## Supplementary Information

A hairpin probe-mediated DNA circuit for the detection of *mecA* gene of *Staphylococcus aureus* based on exonuclease III and DNAzyme-mediated signal amplification

Jiafeng Pan,<sup>a,b</sup> Dongqin Bao,<sup>c</sup> Enhui Bao<sup>c</sup> and Junhua Chen<sup>\*b</sup>

<sup>a</sup> College of Bioscience and Biotechnology, Hunan Agricultural University, Changsha 410128, China.

<sup>b</sup> National-Regional Joint Engineering Research Center for Soil Pollution Control and Remediation in South China, Guangdong Key Laboratory of Integrated Agro-environmental Pollution Control and Management, Institute of Eco-environmental and Soil Sciences, Guangdong Academy of Sciences, Guangzhou 510650, China.

<sup>c</sup> Shuyang Hospital Affiliated to Xuzhou Medical University, Suqian 223800, China.

\*Corresponding author:

E-mail: 222chenjunhua@163.com; jhchen@soil.gd.cn

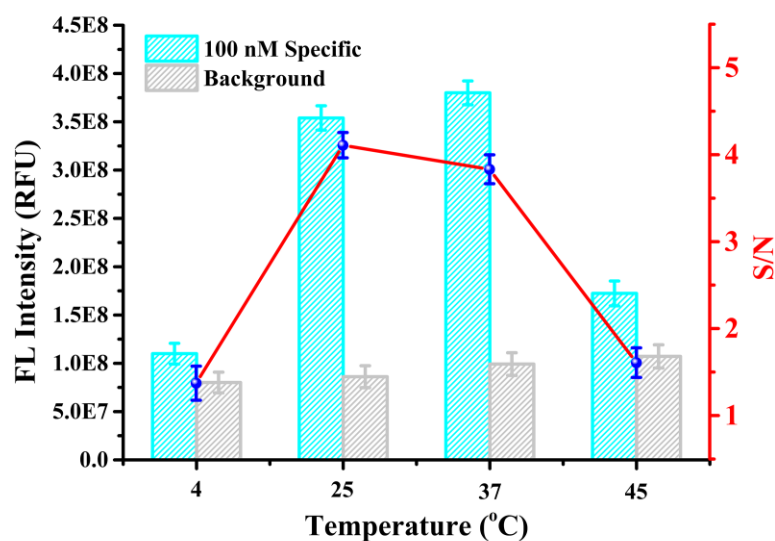

**Fig. S1.** Effect of the reaction temperature on the response of the sensing system. The histograms represent fluorescence intensity of the solution in the presence of 10 nM *mecA* gene (cyan) and in the absence of target (gray), respectively. The red line represents the S/N ratio. The corresponding error bars represent the standard deviation of three independent measurements obtained at each reaction temperature.

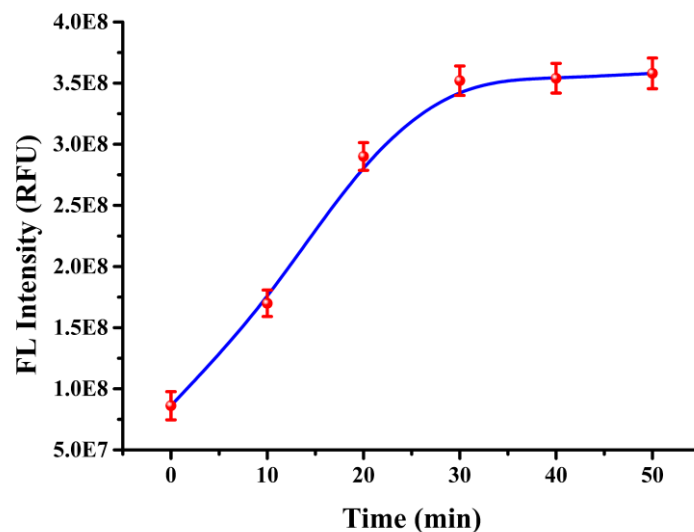

**Fig. S2.** Effect of the reaction time of Exo III-assisted signal amplification on the fluorescence intensity of the proposed method for the detection of *mecA* gene (10 nM). Reactions were performed at room temperature.

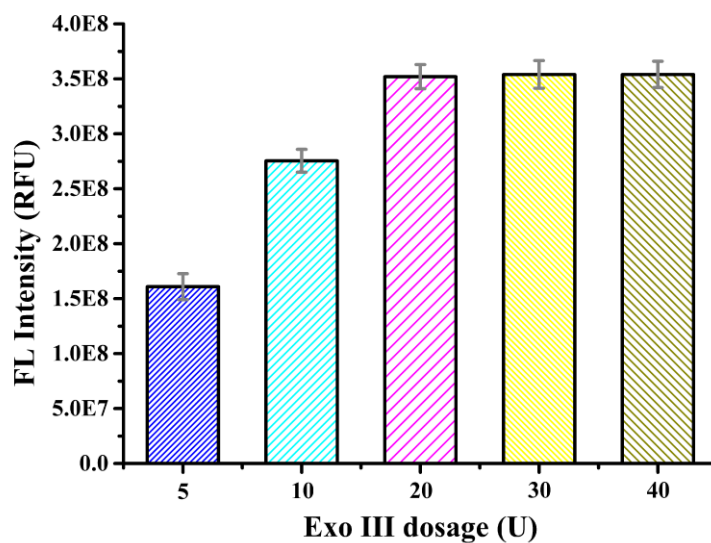

**Fig. S3.** The effect of the Exo III dosage on the aptasensor performance. The experiments were carried out at room temperature.

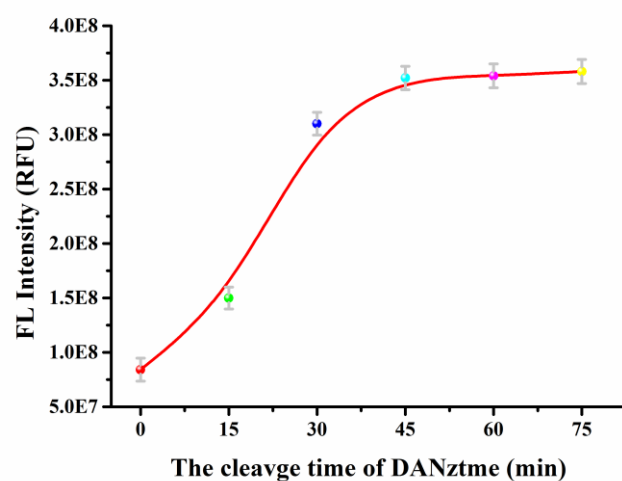

**Fig. S4.** Effect of cleavage time of DNAzyme on the performance of the sensing platform for the detection of *mecA* gene (10 nM). The experiments were performed at room temperature. Error bars represent the standard deviation of three independent measurements.

**Table S1.** Comparison of analytical methods capable of sensing *mecA* gene.

| Method          | Linear range     | Detection limit | References |
|-----------------|------------------|-----------------|------------|
| Fluorescent     | 10 nM-100 nM     | 1 nM            | 1          |
| Electrochemical | 75 fM-200 pM     | 63 fM           | 2          |
| Electrochemical | 50-250 pM        | 23 pM           | 3          |
| Electrochemical | 10 fM-100 nM     | 10 fM           | 4          |
| Fluorescent     | 12.5 pM-3.125 nM | 6.25 pM         | 5          |
| Colorimetric    | 1 pM-100 pM      | 1 pM            | 6          |
| Fluorescent     | 10 fM-100 nM     | 2.4 fM          | 7          |
| Electrochemical | 5 fM-500 pM      | 3.7 fM          | 8          |
| Electrophoretic | 50 pM-100 nM     | 12.3 pM         | 9          |
| Visual          | -                | 0.2 zM          | 10         |
| Fluorescent     | 1 fM-1 nM        | 0.5 fM          | This work  |

**Table S2.** Analysis of serum samples containing the *mecA* gene at different concentrations.

| Sample | Spiked | Found <sup>a</sup> | qPCR <sup>b</sup> | Recovery | RSD  |
|--------|--------|--------------------|-------------------|----------|------|
| 1      | 1 nM   | 0.94 nM            | 0.99 nM           | 94.0%    | 5.9% |
| 2      | 100 pM | 103.0 pM           | 100.5 pM          | 103.0%   | 4.3% |
| 3      | 1 pM   | 0.97 pM            | 1.09 pM           | 97.0%    | 4.8% |
| 4      | 100 fM | 105.4 fM           | 99.5 fM           | 105.4%   | 5.4% |
| 5      | 10 fM  | 9.83 fM            | 10.1 fM           | 98.3%    | 5.7% |

<sup>a</sup>Each sample was analyzed using our proposed biosensor, and the data reported in the table represents the average of five measurements. <sup>b</sup>The concentration of *mecA* in clinical samples was certified using qPCR.

## Reference

- [1] J. Shi, C. Chan, Y. Pang, W. Ye, F. Tian, J. Lyu, Y. Zhang and M. Yang, *Biosens. Bioelectron.*, 2015, **67**, 595-600.
- [2] T. Wang, Z. Zhang, Y. Li and G. Xie, *Sens. Actuators B*, 2015, **221**, 148-154.
- [3] M. Liu, H. Xiang, E. Hua, L. Wang, X. Jing, X. Cao, S. Sheng and G. Xie, *Anal. Lett.*, 2014, **47**, 579-591.
- [4] L. Xu, W. Liang, Y. Wen, L. Wang, X. Yang, S. Ren, N. Jia, X. Zuo and G. Liu, *Biosens. Bioelectron.*, 2018, **99**, 424-430.
- [5] S. Pang, Y. Gao, Y. Li, S. Liu and X. Su, *Analyst*, 2013, **138**, 2749-2754.
- [6] J. Klonoski, R. Mondesire, L. Rea, D.C. Ward and R.D. Jenison, *Anal. Biochem.*, 2010, **396**, 284-289.
- [7] Q. Li, D. Zhou, J. Pan, Z. Liu and J. Chen, *Analyst*, 2018, **143**, 5670-5675.
- [8] G. Dai, Z. Li, F. Luo, Y. Lu, Z. Chu, J. Zhang, F. Zhang, Q. Wang and P. He, *Microchimica Acta*, 2021, **188**, 39.
- [9] Y. Lu, F. Luo, Z. Li, G. Dai, Z. Chu, J. Zhang, F. Zhang, Q. Wang and P. He, *Talanta*, 2021, **222**, 121686.
- [10] Y. K. Kang, S. H. Im, J. S. Ryu, J. Lee and H. J. Chung, *Biosens. Bioelectron.*, 2021, **168**, 112566.
